# Supplementary material for: Monitoring the Effects of Hemicellulase on the Different Proofing Stages of Wheat Aleurone-Rich Bread Dough and Bread Quality
Source: Foods. 2021 Oct 13;10(10):2427. doi: 10.3390/foods10102427 (PMC8535788; doi:10.3390/foods10102427)
Supplement: Supplementary file 1 [file foods-10-02427-s001.zip › Table S1 Effect of hemicellulase addition on pasting properties of wheat aleurone-rich flour.pdf]

**Table S1.** Effect of hemicellulase addition on pasting properties of wheat aleurone-rich flour

| Treatment              | Pasting temperature(°C) | Peak viscosity (BU) | Final viscosity (BU) | Breakdown viscosity (BU) | Setback viscosity (BU) |
|------------------------|-------------------------|---------------------|----------------------|--------------------------|------------------------|
| Control                | 60.63±0.15a             | 1443.00±11.31b      | 2002.50±10.61c       | 397.00±2.83c             | 917.50±0.71c           |
| 20 mg kg <sup>-1</sup> | 60.87±0.31a             | 1367.33±15.53a      | 1934.00±1.41b        | 373.33±7.09b             | 888.67±6.81b           |
| 40 mg kg <sup>-1</sup> | 60.83±0.06a             | 1357.00±3.61a       | 1905.33±6.51ab       | 367.67±4.93b             | 872.33±4.93a           |
| 60 mg kg <sup>-1</sup> | 60.90±0.10a             | 1333.00±14.14a      | 1880.50±7.78a        | 346.50±3.54a             | 863.50±7.78a           |

Means with different letters in the same column correspond to a significant difference between the different dosage of hemicellulase ( $p < 0.05$ ).
